# Supplementary material
Source: HighWire-hosted journal article supplement (https://bibliotheek.ehb.be/content/28/5/526)
Supplement: inline-supplementary-material-1 [file inline-supplementary-material-1.pdf]

## Appendix tables

**Appendix table A1: Results from interaction testing of differential trends in exposure to cigarette packaging in shops in 2016 vs. 2012**

|                    | % change 2016 vs. 2012 | AOR from interaction | p-value for interaction |
|--------------------|------------------------|----------------------|-------------------------|
| Age 11             | -2.1                   | ref                  | ref                     |
| Age 12             | -4.0                   | 0.78                 | 0.250                   |
| Age 13             | -3.3                   | 0.85                 | 0.453                   |
| Age 14             | -3.8                   | 0.95                 | 0.807                   |
| Age 15             | -5.5                   | 0.62                 | 0.033                   |
| Boys               | -3.6                   | ref                  | ref                     |
| Girls              | -4.1                   | 1.06                 | 0.644                   |
| Never used drugs   | -6.3                   | ref                  | ref                     |
| Ever used drugs    | -2.5                   | 0.61                 | 0.062                   |
| Never used alcohol | -4.5                   | ref                  | ref                     |
| Ever used alcohol  | -6.1                   | 1.05                 | 0.737                   |
| Non smoker         | -3.5                   | ref                  | ref                     |
| Occasional smoker  | -8.0                   | 0.93                 | 0.813                   |
| Regular smoker     | -15.6                  | 0.26                 | 0.001                   |

AOR: Adjusted Odds Ratio

**Appendix table A2: Unweighted percentages of usual sources of cigarettes among regular smokers 2010 – 2016**

| Year                      | 2010 | 2012 | 2014 | 2016 |
|---------------------------|------|------|------|------|
| Given by friends          | 50.3 | 45.4 | 43.5 | 44.7 |
| Bought from newsagent     | 46.1 | 46.4 | 43.0 | 30.4 |
| Bought from friends       | 34.3 | 32.5 | 26.9 | 25.5 |
| Given by "someone else"   | 20.5 | 21.4 | 21   | 21.1 |
| Bought from garage        | 15.4 | 13.9 | 7.5  | 6.8  |
| Bought from supermarket   | 14.9 | 16.9 | 10.8 | 9.9  |
| Given by siblings         | 13.8 | 11.2 | 9.7  | 6.2  |
| Bought from a machine     | 10.7 | 2.0  | 3.8  | 2.5  |
| Given by parents          | 10.4 | 9.5  | 8.1  | 9.3  |
| Bought from "other" shop  | 9.0  | 12.5 | 14.5 | 8.1  |
| Bought from street market | 5.9  | 8.1  | 7.5  | 6.2  |
| Bought from internet      | 0.3  | 0.7  | 1.6  | 1.9  |

**Appendix table A3: Changes in usual sources of cigarettes among regular and occasional child smokers 2010 - 2016**

|                    | Year       | 2010 (583) | 2012 (484)         | 2014 (269)         | 2016 (271)         |
|--------------------|------------|------------|--------------------|--------------------|--------------------|
| Bought any shop    | %          | 44.2       | 43.9               | 46.2               | 28.4               |
|                    | AOR 95% CI | ref        | 0.90 (0.69 ; 1.18) | 1.00 (0.73 ; 1.38) | 0.55 (0.36 ; 0.84) |
| Bought non shop    | %          | 32.4       | 30.3               | 24.4               | 20.8               |
|                    | AOR 95% CI | ref        | 0.89 (0.67 ; 1.18) | 0.69 (0.49 ; 0.98) | 0.49 (0.31 ; 0.77) |
| Given by anyone    | %          | 68.3       | 67.3               | 63.1               | 65.7               |
|                    | AOR 95% CI | ref        | 0.99 (0.75 ; 1.31) | 0.83 (0.60 ; 1.16) | 0.80 (0.53 ; 1.21) |
| Bought small shops | %          | 39.8       | 38.0               | 41.9               | 24.9               |
|                    | AOR 95% CI | ref        | 0.90 (0.69 ; 1.19) | 1.04 (0.76 ; 1.45) | 0.47 (0.30 ; 0.73) |
| Bought supermarket | %          | 10.1       | 11.1               | 7.5                | 6.6                |
|                    | AOR 95% CI | ref        | 1.02 (0.66 ; 1.58) | 0.61 (0.33 ; 1.10) | 0.76 (0.33 ; 1.74) |
| Bought friends     | %          | 28.7       | 29.1               | 23.7               | 20.4               |
|                    | AOR 95% CI | ref        | 0.99 (0.74 ; 1.32) | 0.80 (0.56 ; 1.13) | 0.56 (0.35 ; 0.89) |

**Appendix table A4: Changes in perceived ease of buying cigarettes in shops among regular and occasional child smokers 2010 - 2016**

|                                                 | Year (N)      | 2010 (298) | 2012 (218)        | 2014 (117)        | 2016 (106)        |
|-------------------------------------------------|---------------|------------|-------------------|-------------------|-------------------|
| Been refused sale of cigarettes at last attempt | %             | 29.7       | 21.0              | 23.4              | 34.0              |
|                                                 | AOR (95% CI)  | ref        | 0.71 (0.46; 1.11) | 0.77 (0.46; 1.30) | 1.43 (0.74; 2.78) |
| Reporting cigarettes easy to buy in shops       | %             | 61.0       | 65.5              | 65.0              | 64.5              |
|                                                 | AOR (95% CI ) | ref        | 1.21 (0.87; 1.70) | 0.97 (0.65; 1.45) | 0.65 (0.38; 1.11) |

AOR = Adjusted Odds Ratio, adjusted for age, sex, ever use of alcohol and ever use of drugs
